# The American Journal of Psychiatry

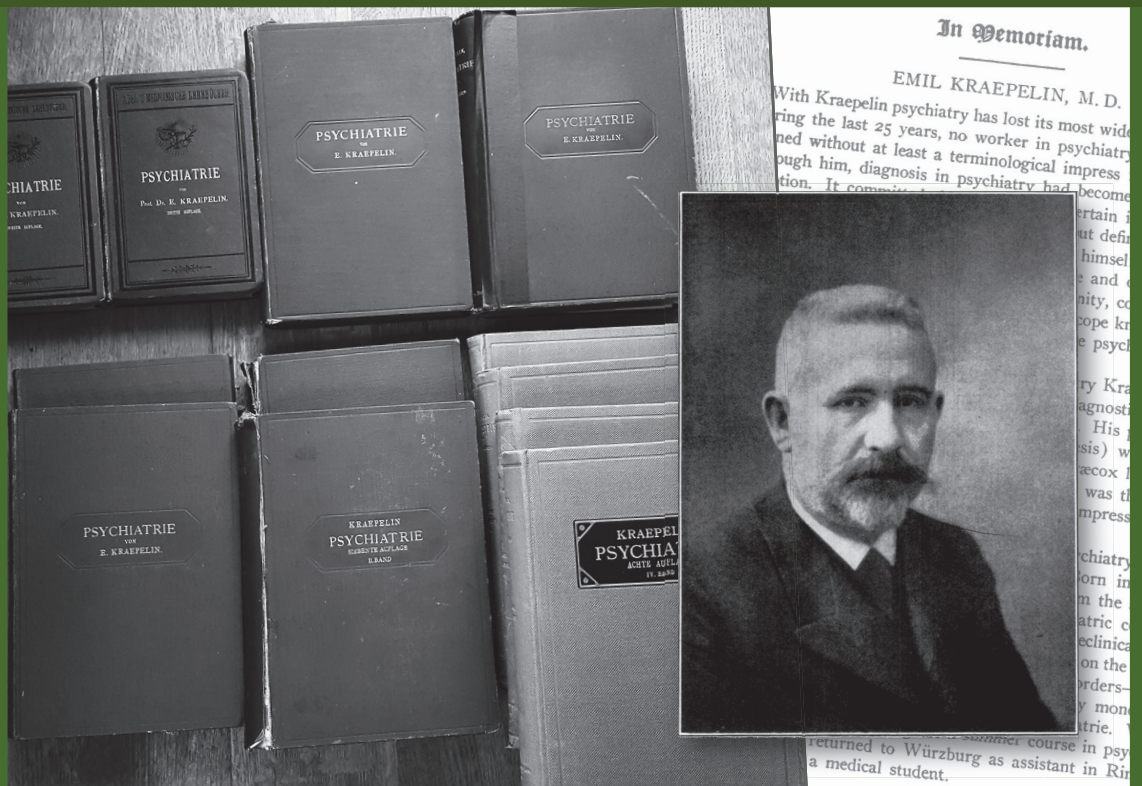

Criticisms of Kraepelin's Psychiatric Nosology: 1896–1927

Ketamine for Rapid Reduction of Suicidal Thoughts in Major Depression: A Midazolam-Controlled Randomized Clinical Trial

Association of Hormonal Contraception With Suicide Attempts and Suicides

Rates and Predictors of Conversion to Schizophrenia or Bipolar Disorder Following Substance-Induced Psychosis
