## PERSPECTIVAS

### EDITORIALES

- 297 Ketamina: ¿Quo Vadis?**  
*Charles B. Nemeroff, M.D., Ph.D.*
- 300 Dilema anticonceptivo: Uso de anticonceptivos hormonales asociado a un riesgo aumentado de intento suicida y de suicidio**  
*David Brent, M.D.*
- 303 Psicosis inducida por sustancias: ¿Un indicador del desarrollo de psicosis primaria?**  
*Subroto Ghose, M.D., Ph.D.*
- 305 El cerebro siente el dolor del hábito de tomar en la adolescencia**  
*Jennifer L. Stewart, Ph.D.*

### TRATAMIENTO EN PSIQUIATRÍA

- 307 Tratamiento para pacientes con un trastorno neurológico funcional (trastorno de conversión): Un enfoque integrado**  
*Mary A. O'Neal, M.D., Gaston Baslet, M.D.* EMC • AUDIO

### IMÁGENES EN PSIQUIATRÍA

- 315 Los gatos de Louis Wain: Mil maneras de dibujar la mente**  
*Stefano Damiani, M.D., Laura Fusar-Poli, M.D.*

### REVISIÓN Y RESEÑAS

- 316 Críticas a la nosología psiquiátrica de Kraepelin: 1896–1927**  
*Kenneth S. Kendler, M.D., Eric J. Engstrom, Ph.D.*

## NUEVAS INVESTIGACIONES

### ARTÍCULOS

- 327 Ketamina para la rápida reducción de los pensamientos suicidas en la depresión mayor: Un ensayo clínico controlado con midazolam**  
*Michael F. Grunebaum, M.D., et al.* EDITORIALE • AUDIO
- 336 Asociación de la anticoncepción hormonal a los intentos de suicidio y a los suicidios**  
*Charlotte Wessel Skovlund, Ph.D., et al.* EDITORIALE • EMC • AUDIO • GUÍAS CLÍNICAS
- 343 Tasas y predictores de conversión a esquizofrenia o trastorno bipolar después de la psicosis inducida por sustancias**  
*Marie Stefanie Kejser Starzer, M.D., et al.* EDITORIALE • EMC • AUDIO • GUÍAS CLÍNICAS
- 351 Un estudio longitudinal, basado en la población, de los síntomas y los signos anteriores al inicio de la psicosis**  
*Abigail Livny, Ph.D., et al.* VIDEO • GUÍAS CLÍNICAS
- 359 Diferencias en la morfometría cerebral cortical y subcortical entre pacientes con trastorno del espectro autista e individuos sanos a lo largo de la vida: Resultados del grupo de trabajo ENIGMA ASD**  
*Daan van Rooij, Ph.D., et al.* VIDEO
- 370 Trayectorias de desarrollo cerebral alteradas en adolescentes después de iniciar el hábito de tomar alcohol**  
*Adolf Pfefferbaum, M.D., et al.* EDITORIALE • AUDIO • GUÍAS CLÍNICAS

CARTAS AL EDITOR

- 381 El aumento de la preponderancia del suicidio en los hombres coincidiendo con una reducción a la mitad en el total de suicidios en la población danesa debería crear conciencia de la depresión masculina

*Søren D. Østergaard, M.D., Ph.D.*

- 382 Patogenicidad molecular del auto-anticuerpo receptor anti-NMDA de pacientes con primer episodio de psicosis

*Julie Jézéquel, Ph.D., et al.*

RESEÑAS BIBLIOGRÁFICAS

- 384 On the Couch: A Repressed History of the Analytic Couch From Plato to Freud [En el diván: Una historia reprimida del diván analítico desde Platón hasta Freud]

*Ellen Blumenthal, M.D.*

- 384 The Arabic Freud: Psychoanalysis and Islam in Modern Egypt [El Freud árabe: Psiconálisis e islam en el Egipto moderno]

*Fady Hajal, M.D.*

- 386 Libros recibidos

OTROS TEMAS DE INTERÉS

- 386 [Disclosure of Editors' Financial Relationships]

- 387 Educación Médica Continuada

**Cubierta:** [In this issue, Drs. Kendler and Engstrom (p. 316) provide a historical analysis of the works of Emil Kraepelin, a leading nosologist and founding figure in early psychiatry, and review the responses to these works from his contemporaries. Photo of Kraepelin's second through eighth editions provided by Dr. Kendler from his library. The image of Kraepelin is from the obituary by Adolf Meyer that appeared in *The American Journal of Psychiatry* (Am J Psychiatry 1927; 83:748–755; copyright © 1927 American Psychiatric Association). Design by Susan Westrate.]

**La Tabla de Contenidos y resúmenes de Este Número Está Disponible en Español**

[This issue's Table of Contents is available in Spanish]

(Abstracts are also available in Spanish)

Translation presented in collaboration with the Office of Global Health,  
Rutgers-Robert Wood Johnson Medical School

Support for this effort provided by ACTA Colombia.

**Translation courtesy of**

**Sergi Casals, M.A.**, Garuna, Medellín, Colombia ([www.garunaeditors.com](http://www.garunaeditors.com))

**Carlos López Jaramillo, M.D., M.Sc., Ph.D.**, Universidad de Antioquia, Medellín, Colombia

**Javier I. Escobar, M.D., M.Sc.**, Rutgers-Robert Wood Johnson Medical School

**AUDIO** Highlighted in AJP Audio, a downloadable .mp3 file available at [ajp.psychiatryonline.org](http://ajp.psychiatryonline.org)

**EMC** A course covering the content of this article is available online for paid subscribers to the AJP CME Course program

**EDITORIAL** Discussed in one of the issue's editorials

**GUÍAS CLÍNICAS** Clinical Guidance provided on the English table of contents

**VIDEO** Highlighted online by Deputy Editor Daniel S. Pine, M.D.

## Críticas a la nosología psiquiátrica de Kraepelin: 1896–1927

Kenneth S. Kendler, M.D., Eric J. Engstrom, Ph.D.

La nosología psiquiátrica de Kraepelin, propuesta en las ediciones 5ª y 6ª de su libro, publicadas en 1896 y 1899, no fue aceptada inmediatamente a nivel mundial, sino que se encontró con una crítica sustancial y sostenida. Los autores revisan las críticas que Adolf Meyer, Friedrich Jolly, Eugenio Tanzi, Alfred Hoche, Karl Jaspers y Willy Hellpach hicieron al trabajo de Kraepelin, publicadas durante la vida del autor. Estos críticos hicieron seis observaciones principales. Primero, las nuevas categorías de demencia precoz y locura maniaco-depresiva de Kraepelin eran demasiado amplias y demasiado heterogéneas. Segundo, su énfasis en el curso de la enfermedad partía de una concepción errónea, ya que la misma enfermedad puede tener como resultado episodios breves o un curso crónico. Tercero, el éxito de su sistema estaba basado en la calidad de sus libros y su estima académica, más que en hallazgos empíricos. Cuarto, su enfoque en los síntomas y los signos tuvo como consecuencia el descuido del paciente en

su totalidad y de su historia de vida. Quinto, el énfasis temprano de Kraepelin en la psicología experimental no dio los frutos esperados. Sexto, Kraepelin estaba comprometido a aplicar el modelo médico de enfermedad. Sin embargo, debido a la relación muchos a muchos entre la patología cerebral y los síntomas psiquiátricos, puede ser que en psiquiatría no existan entidades patológicas naturales propiamente. La mayoría de los debates actuales sobre la nosología de Kraepelin tienen su origen en estas discusiones tempranas y se enriquecerían con una valoración más a fondo de sus contextos históricos. A pesar de la autoridad que Kraepelin tenía, y sigue teniendo en la actualidad, la suya fue solamente una voz entre muchas, y una buena manera de reconsiderarlas sería con un entendimiento más profundo de los retos conceptuales fundamentales de nuestro campo.

*(Am J Psychiatry 2018; 175:316–326)*

## Ketamina para la rápida reducción de los pensamientos suicidas en la depresión mayor: Un ensayo clínico controlado con midazolam

Michael F. Grunebaum, M.D., Hanga C. Galfalvy, Ph.D., Tse-Hwei Choo, M.P.H., John G. Keilp, Ph.D., Vivek K. Moitra, M.D., Michelle S. Parris, B.A., Julia E. Marver, B.A., Ainsley K. Burke, Ph.D., Matthew S. Milak, M.D., M. Elizabeth Sublette, M.D., Ph.D., Maria A. Oquendo, M.D., Ph.D., J. John Mann, M.D.

**Objetivo:** La farmacoterapia para disminuir rápidamente la ideación suicida en depresión puede reducir el riesgo de suicidio. La reducción rápida de pensamientos suicidas después del tratamiento con ketamina se ha estudiado principalmente en pacientes con bajos niveles de ideación suicida. Los autores probaron el efecto agudo de la ketamina intravenosa subanestésica adyuvante en ideación suicida clínicamente significativa en pacientes con trastorno de depresión mayor.

**Método:** En un ensayo clínico aleatorizado, adultos (N=80) con trastorno de depresión mayor en curso y con una puntuación de  $\geq 4$  en la Escala de Ideación Suicida (SSI, por sus siglas en inglés), de los cuales 54% (N=43) estaban tomando medicación antidepresiva, fueron asignados aleatoriamente para recibir infusión de ketamina o de midazolam. La medida primaria de resultado fue la puntuación en la escala SSI 24 horas después de la infusión (el día 1).

**Resultados:** La reducción en la puntuación de la escala SSI el día 1 fue 4,96 puntos mayor para el grupo de ketamina en comparación con el grupo de midazolam (IC 95%=2,33–7,59; d de Cohen=0,75). La proporción de sujetos que res-

pondieron a la infusión (definidos por tener una reducción  $\geq 50\%$  de la puntuación en la escala SSI) el día 1 fue 55% para el grupo de ketamina y 30% para el grupo de midazolam (*odds ratio*=2,85; IC 95%=1,14–7,15; número necesario a tratar=4,0). La mejoría en la subescala de depresión *Perfil de los Estados de Ánimo* fue mayor el día 1 para el grupo de ketamina en comparación con el grupo de midazolam (estimación=7,65; CI 95%=1,36–13,94), y este efecto medió 33,6% del efecto de la ketamina en la puntuación de la escala SSI. Los efectos secundarios fueron de corta duración y la mejoría clínica se mantuvo hasta por 6 semanas con farmacoterapia estándar optimizada adicional en un seguimiento no controlado.

**Conclusiones:** La ketamina adyuvante demostró una mayor reducción en la ideación suicida clínicamente significativa en 24 horas en pacientes deprimidos, en comparación con el midazolam, parcialmente con independencia del efecto de los antidepresivos.

(*Am J Psychiatry* 2018; 175:327–335)

# Asociación de la anticoncepción hormonal a los intentos de suicidio y a los suicidios

Charlotte Wessel Skovlund, Ph.D., Lina Steinrud Mørch, Ph.D., Lars Vedel Kessing, D.M.Sc., Theis Lange, Ph.D., Øjvind Lidegaard, D.M.Sc.

**Objetivo:** El propósito de este estudio fue evaluar el riesgo relativo de intento suicida y de suicidio en los usuarios de anticoncepción hormonal.

**Método:** Los autores evaluaron las asociaciones entre el uso de anticonceptivos hormonales y el intento suicida y el suicidio en un estudio de cohorte, prospectivo, de ámbito nacional, de todo mujeres en Dinamarca, que no tenían diagnósticos psiquiátricos, no tomaban antidepresivos ni usaron anticonceptivos hormonales antes de los 15 años y que cumplieron 15 años durante el período de estudio, que se extendió desde 1996 hasta 2013. Registros en todo el ámbito nacional ofrecieron información individual actualizada sobre el uso de la anticoncepción hormonal, los intentos suicidas, los suicidios y las potenciales variables de confusión. Los diagnósticos psiquiátricos o el uso de antidepresivos durante el período de estudio se consideraron potenciales mediadores entre el uso de anticonceptivos hormonales y el riesgo de intento de suicidio. Los cocientes de riesgo (*hazard ratios*) ajustados para el intento suicida y el suicidio se estimaron para las usuarias de anticoncepción hormonal en comparación con aquellas que nunca usaron anticoncepción hormonal.

**Resultados:** En aproximadamente medio millón de mujeres a las que se les hizo seguimiento en promedio 8,3 años (3,9 millones de años-persona), con una edad media de 21 años, se identificaron 6.999 primeros intentos de suicidio y 71 suicidios. En comparación con las mujeres que nunca usaron anticonceptivos hormonales, el riesgo relativo en las usuarias actuales y recientes fue 1,97 (IC 95% =1,85–2,10) para intento suicida y 3,08 (IC 95%=1,34–7,08) para suicidio. Las estimaciones de riesgo para intento de suicidio fueron 1,91 (IC 95%=1,79–2,03) para productos orales combinados, 2,29 (IC 95%=1,77–2,95) para productos orales de progestágeno solo, 2,58 (IC 95%=2,06–3,22) para el anillo vaginal y 3,28 (IC 95%=2,08–5,16) para el parche. La asociación entre el uso de anticonceptivos hormonales y un primer intento suicida alcanzó su punto máximo después de 2 meses de usarlos.

**Conclusiones:** El uso de anticonceptivos hormonales estuvo asociado de manera positiva al subsiguiente intento de suicidio y al suicidio. Las mujeres adolescentes experimentaron el riesgo relativo más alto.

(*Am J Psychiatry* 2018; 175:336–342)

# Tasas y predictores de conversión a esquizofrenia o trastorno bipolar después de la psicosis inducida por sustancias

Marie Stefanie Kejser Starzer, M.D., Merete Nordentoft, Dr.Med.Sc., Carsten Hjorthøj, Ph.D., M.Sc.

**Objetivo:** Los autores investigaron las tasas de conversión a esquizofrenia y trastorno bipolar después de una psicosis inducida por sustancias, y los factores de riesgo de conversión.

**Método:** Toda la información de los pacientes se obtuvo del Sistema de Registro Civil Danés y del Registro Central de Investigación Psiquiátrica. La población de estudio incluyó todas las personas que recibieron un diagnóstico de psicosis inducida por sustancias entre 1994 y 2014 (N=6.788); se hizo seguimiento de los pacientes hasta la primera aparición de esquizofrenia o trastorno bipolar o hasta la muerte, emigración o hasta agosto de 2014. Se utilizó el método de Kaplan-Meier para obtener probabilidades acumuladas de la conversión de psicosis inducida por sustancias a esquizofrenia o trastorno bipolar. Se usaron modelos de regresión de Cox de riesgos proporcionales para calcular los cocientes de riesgo de todas las variables.

**Resultados:** En general, 32,2% (IC 95%=29,7–34,9) de los pacientes con una psicosis inducida por sustancias hicieron la

conversión a trastornos del espectro bipolar o esquizofrenia. La tasa de conversión más alta se encontró para la psicosis inducida por cannabis, en la cual 47,4% (IC 95%=42,7–52,3) hicieron conversión hacia esquizofrenia o trastorno bipolar. Una menor edad cronológica se asoció a un mayor riesgo de conversión a esquizofrenia. La autolesión después de una psicosis inducida por sustancias estuvo ligada de forma significativa a un mayor riesgo de conversión tanto a esquizofrenia como a trastorno bipolar. La mitad de los casos de conversión a esquizofrenia se dieron en los 3,1 primeros años después de una psicosis inducida por sustancias, y la mitad de los casos de conversión a trastorno bipolar ocurrieron en los primeros 4,4 años.

**Conclusiones:** La psicosis inducida por sustancias está fuertemente asociada al desarrollo de varias enfermedades mentales, y es necesario un período largo de seguimiento para identificar la mayoría de los casos.

(*Am J Psychiatry* 2018; 175:343–350)

## Un estudio longitudinal, basado en la población, de los síntomas y los signos anteriores al inicio de la psicosis

Abigail Livny, Ph.D., Abraham Reichenberg, Ph.D., Eyal Fruchter, M.D., Rinat Yoffe, M.A., Shira Goldberg, M.A., Daphna Fenchel, M.Sc., Shimon Burshtein, M.D., Eitan Bachar, Ph.D., Michael Davidson, M.D., Mark Weiser, M.D.

**Objetivo:** Los autores se propusieron caracterizar los síntomas de los pacientes que más adelante son hospitalizados por trastornos psicóticos en ambulatorios de salud mental primaria e investigar si esos síntomas pueden servir para predecir el posterior inicio de la enfermedad psicótica.

**Método:** Fue un estudio de cohorte de nacimiento, prospectivo, basado en la población y utilizando datos de registros nacionales. La muestra (N=114.983) incluyó individuos de entre 18 y 21 años que estaban prestando servicio militar en Israel, examinados en las clínicas militares ambulatorias de salud mental durante 72 meses consecutivos.

**Resultados:** En general, 1.092 individuos (0,95%) no diagnosticados con un trastorno psicótico en el momento del examen médico fueron hospitalizados por trastorno psicótico no afectivo en los 9 años siguientes al examen índice. Un análisis de componentes principales de los síntomas presentados en el examen índice encontró que un grupo de síntomas de trastorno del pensamiento, anomalías perceptuales, poca orientación y tendencias suicidas estaban asociados a un riesgo más alto de hospitalización por trastorno psicótico

no afectivo en los 14 días después del examen (cociente de riesgo=45,80; IC 95%=22,87–91,73), en los 15–111 días después del examen, (cociente de riesgo=19,59; IC 95%=13,08–29,33), en los 12–365 días después del examen (cociente de riesgo=4,94; IC 95%=2,59–9,40) y en los 1–3,5 años después del examen (cociente de riesgo=3,42; IC 95%=2,21–5,28), pero no estaba asociado a un riesgo de hospitalización en los 3,5 años o más después del examen (cociente de riesgo=1,57; IC 95%=0,91–2,71). A pesar del riesgo más alto, los valores predictivos positivos de este grupo de síntomas fueron bajos, oscilando entre 0,54% y 1,99%.

**Conclusiones:** En personas entre los 18 y los 21 años, la presencia de síntomas psicóticos se asoció a una posterior hospitalización por un trastorno psicótico no afectivo. Sin embargo, los bajos valores predictivos positivos de los síntomas obtenidos en los contextos de atención primaria en salud mental sugieren que los síntomas solos no sirven para predecir la posterior hospitalización por trastornos psicóticos no afectivos.

(*Am J Psychiatry* 2018; 175:351–358)

## Diferencias en la morfometría cerebral cortical y subcortical entre pacientes con trastorno del espectro autista e individuos sanos a lo largo de la vida: Resultados del grupo de trabajo ENIGMA ASD

Daan van Rooij, Ph.D., Evdokia Anagnostou, M.D., Celso Arango, M.D., Ph.D., Guillaume Auzias, Ph.D., Marlene Behrmann, Ph.D., Geraldo F. Busatto, M.D., Ph.D., Sara Calderoni, M.D., Ph.D., Eileen Daly, Ph.D., Christine Deruelle, Ph.D., Adriana Di Martino, Ph.D., Ilan Dinstein, Ph.D., Fabio Luis Souza Duran, Ph.D., Sarah Durston, Ph.D., Christine Ecker, Ph.D., Damien Fair, Ph.D., Jennifer Fedor, B.S., Jackie Fitzgerald, Ph.D., Christine M. Freitag, Ph.D., Louise Gallagher, M.D., Ph.D., Ilaria Gori, M.Sc., Shlomi Haar, Ph.D., Liesbeth Hoekstra, M.Sc., Neda Jahanshad, Ph.D., Maria Jalbrzikowski, Ph.D., Joost Janssen, Ph.D., Jason Lerch, Ph.D., Beatriz Luna, Ph.D., Mauricio Moller Martinho, M.D., Ph.D., Jane McGrath, Ph.D., Filippo Muratori, Ph.D., Clodagh M. Murphy, M.R.C.Psych., Ph.D., Declan G.M. Murphy, M.D., F.R.C.Psych., Kirsten O'Hearn, Ph.D., Bob Oranje, Ph.D., Mara Parellada, M.D., Ph.D., Alessandra Retico, Ph.D., Pedro Rosa, M.D., Katya Rubia, Ph.D., Devon Shook, Ph.D., Margot Taylor, Ph.D., Paul M. Thompson, Ph.D., Michela Tosetti, Ph.D., Gregory L. Wallace, Ph.D., Fengfeng Zhou, Ph.D., Jan K. Buitelaar, M.D., Ph.D.

**Objetivo:** Los estudios de neuroimágenes muestran diferencias estructurales en las regiones cerebrales tanto corticales como subcorticales en niños y adultos con trastorno del espectro autista (TEA) en comparación con sujetos sanos. Los hallazgos son inconsistentes, sin embargo, y no está claro cómo evolucionan las diferencias a lo largo de la vida. Los autores investigaron las diferencias en la morfometría cerebral entre individuos con TEA y sujetos sanos, transversalmente a lo largo de la vida, en una muestra grande multinacional del grupo de trabajo ENIGMA (*Enhancing Neuroimaging Genetics Through Meta-Analysis*) ASD [Mejorando la Genética en las Neuroimágenes por medio de meta-análisis en TEA].

**Método:** La muestra incluyó 1.571 pacientes con TEA y 1.651 sujetos sanos de control (rango de edad: 2–64 años) de 49 sedes participantes. Las imágenes por resonancia magnética se procesaron en diferentes sedes con un protocolo armonizado basado en un programa informático validado de segmentación automatizada. Se utilizaron mega-análisis para evaluar las diferencias entre casos y controles en los volúmenes subcorticales, el grosor cortical y el área de la superficie. El desarrollo de la morfometría cerebral a lo largo de la vida se modeló utilizando un enfoque de polinomios fraccionarios.

**Resultados:** El mega-análisis de casos-controles demostró que los TEA estaban asociados a volúmenes subcorticales más pequeños del pálido, el putamen, la amígdala y el núcleo accumbens (tamaños de efecto [d de Cohen]: 0,13 a -0,13), mayor grosor cortical en la corteza frontal y grosor reducido en la corteza temporal (tamaños de efecto: -0,21 a 0,20). Los análisis de los efectos de la edad indican que el desarrollo del grosor cortical está alterado en los TEA, y las mayores diferencias se observan alrededor de la adolescencia. No se observó ninguna interacción de edad y TEA en las particiones subcorticales.

**Conclusiones:** El grupo de trabajo ENIGMA ASD ofrece el mayor estudio de diferencias en morfometría cerebral en TEA hasta el momento, utilizando una metodología de análisis bien establecida, validada y públicamente disponible. Los pacientes con TEA mostraron una morfometría alterada en las áreas cognitiva y afectiva del estriado, la corteza frontal y la corteza temporal. Se observaron trayectorias de desarrollo complejas para las diferentes regiones, con un punto álgido del desarrollo alrededor de la adolescencia. Estos hallazgos sugieren una interacción en el desarrollo anómalo de las regiones estriatal, frontal y temporal en los TEA a lo largo de la vida.

(*Am J Psychiatry* 2018; 175:359–369)



## Trayectorias de desarrollo cerebral alteradas en adolescentes después de iniciar el hábito de tomar alcohol

Adolf Pfefferbaum, M.D., Dongjin Kwon, Ph.D., Ty Brumback, Ph.D., Wesley K. Thompson, Ph.D., Kevin Cummins, M.A., Susan F. Tapert, Ph.D., Sandra A. Brown, Ph.D., Ian M. Colrain, Ph.D., Fiona C. Baker, Ph.D., Devin Prouty, Ph.D., Michael D. De Bellis, M.D., M.P.H., Duncan B. Clark, M.D., Ph.D., Bonnie J. Nagel, Ph.D., Weiwei Chu, M.A., Sang Hyun Park, Ph.D., Kilian M. Pohl, Ph.D., Edith V. Sullivan, Ph.D.

**Objetivo:** Los autores buscaron evidencia de la trayectoria alterada de crecimiento cerebral en adolescentes, asociada al consumo moderado y excesivo de alcohol, en un estudio nacional, de gran tamaño, prospectivo y multicéntrico de adolescentes antes y después del inicio de consumo "perceptible" de alcohol.

**Método:** Este estudio examinó 483 adolescentes (edades entre 12 y 21 años) antes del inicio del hábito de beber y 1 y 2 años después. En la evaluación después de 2 años, 356 participantes seguían cumpliendo los criterios de inclusión en el estudio de consumo nulo/bajo. Se utilizó IRM para cuantificar el volumen regional cortical y el de sustancia blanca. El cambio porcentual por año (pendientes) en adolescentes que siguieron cumpliendo los criterios de consumo nulo/bajo sirvieron como trayectorias control del desarrollo, para compararlas con aquellas de los que iniciaron el hábito de consumir alcohol de manera moderada/excesiva.

**Resultados:** En los jóvenes con consumo de alcohol nulo/bajo, el volumen de sustancia gris disminuyó a lo largo de la adolescencia y se desaceleró en muchas regiones más tarde en la adolescencia. Complementando las disminuciones de

sustancia gris, las regiones de sustancia blanca crecieron a ritmos más rápidos a edades más tempranas y se desaceleraron al inicio de la edad adulta. Los jóvenes que iniciaron el hábito de tomar en exceso exhibieron una trayectoria acelerada de la sustancia gris de la corteza frontal, divergente de la norma. Aunque no se observaron efectos significativos en las trayectorias en los bebedores moderados, su posición inmediata entre los jóvenes de consumo nulo/bajo y los jóvenes de consumo excesivo sugiere que la dosis tiene efecto. Ni el consumo concurrente de marihuana ni los volúmenes en la evaluación inicial contribuyeron de forma significativa al efecto del alcohol.

**Conclusiones:** La iniciación del hábito de tomar alcohol durante la adolescencia, con o sin el consumo concurrente de marihuana, trastorna las trayectorias normales de crecimiento cerebral. Los factores que posiblemente contribuyen a las trayectorias anormales de volumen cortical incluyen el período de consumo máximo en el último año y antecedentes familiares de alcoholismo.

(*Am J Psychiatry* 2018; 175:370–380)
